# Supplementary material for: Epoxidation of alkenes and oxidation of alcohols with hydrogen peroxide catalyzed by a manganese(v) nitrido complex
Source: Royal Society of Chemistry journal article supplement (doi:10.1039/c0cc05487a), 2011-01-01
Supplement: c0cc05487a.pdf [file c0cc05487a.pdf]

**Electronic Supplementary Information**

**Epoxidation of Alkenes and Oxidation of Alcohols with Hydrogen  
Peroxide Catalyzed by a Manganese(V) Nitrido Complex**

**Hoi-Ki Kwong, Po-Kam Lo, Kai-Chung Lau<sup>\*</sup> and Tai-Chu Lau<sup>\*</sup>**

*Institute of Molecular Functional Materials and Department of Biology and  
Chemistry, City University of Hong Kong, Tat Chee Avenue, Kowloon Tong, Hong  
Kong, China.*

## 1. Materials

All chemicals were of reagent grade unless otherwise specified.  $(\text{PPh}_4)_2[\text{Mn}(\text{N})(\text{CN})_4]$  was synthesized according to a published procedure.<sup>1</sup> The purity of the complex was determined by CHN elemental analysis and UV/vis spectrophotometry. Alkenes were purified by passing through a short column of neutral alumina prior to use. Acetic acid and acetonitrile were purified according to standard methods.<sup>2</sup> Hydrogen peroxide (35% Riedel-de Haën) was used as received and standardized by iodometry.<sup>3,4</sup> 2-Methyl-1-phenyl-2-propyl hydroperoxide (MPPH) was prepared according to a literature method,<sup>5</sup> and its purity was determined to be >99% by NMR. Active MPPH levels were further measured by iodometric titrations, which showed >99% peroxide activity.

## 2. Instrumentation

Gas chromatographic analyses were performed on a HP5890 GC/FID equipped with a HP-5MS (30 m  $\times$  0.25 mm i.d.) or a DB-FFAP (30 mm  $\times$  0.25 mm i.d.) column. GC/MS measurements were carried out on a HP6890 gas chromatograph interfaced to a HP 5975 mass selective detector. Elemental analyses were done on an Elementar Vario EL analyzer. Electrospray ionization mass spectrometry (ESI/MS) was performed on a PE SCIEX API 365 mass spectrometer.

### 3. Catalytic oxidation

All experiments were carried out under argon atmosphere, unless otherwise specified.

#### General procedure for catalytic Oxidation of Alkenes and Alcohols with H<sub>2</sub>O<sub>2</sub>

H<sub>2</sub>O<sub>2</sub> was added into a pink solution of (PPh<sub>4</sub>)<sub>2</sub>[Mn(N)(CN)<sub>4</sub>] (0.01 mmol) in CH<sub>3</sub>CN (1 mL) containing substrate (1 mmol) and acetic acid (0-1 mmol) at 23°C. The mixture was vigorously stirred for 10 min – 16 h. Chlorobenzene was then added as an internal standard, and the mixture was analyzed by GC and GC-MS.

#### Kinetic isotope effects for benzyl alcohol oxidation

Kinetic isotope effects were investigated by using an equimolar mixture of benzyl alcohol and *d*<sub>7</sub>-benzyl alcohol as substrate. The organic products were quantified and identified by GC and GC-MS. The KIE value was obtained by taking the ratio of the corresponding areas from GC measurements.

### 4. Computational Study

The reaction mechanism for the tetracyano-nitrido manganate complex MnN(CN)<sub>4</sub><sup>2-</sup> catalyzed epoxidation of ethene with hydrogen peroxide in the presence of acetic acid has been theoretically studied by density functional theory. The structures and energies of all molecular species are calculated at the B3LYP level<sup>6</sup> with the LanL2DZ basis set<sup>7</sup> for transition metal (Mn) and 6-311++G(d,p) basis set for the nonmetal atoms. The polarizable continuum model (PCM)<sup>8</sup> is used to account for the solvent effects in acetonitrile. All calculations are performed with Gaussian 03 package of program.<sup>9</sup>

**Table S1:** Relative energetics (in kcal/mol) of epoxidation of ethene by tetracyanonitrido manganese complex with hydrogen peroxide and acetic acid at gas phase and in acetonitrile.

|                                                                                                                | Gas phase                |                          | Acetonitrile (PCM)       |                          |
|----------------------------------------------------------------------------------------------------------------|--------------------------|--------------------------|--------------------------|--------------------------|
|                                                                                                                | $\Delta H_{298}^{\circ}$ | $\Delta G_{298}^{\circ}$ | $\Delta H_{298}^{\circ}$ | $\Delta G_{298}^{\circ}$ |
| $\text{MnN}(\text{CN})_4^{2-} + \text{H}_2\text{O}_2 + \text{CH}_2\text{CH}_2 + 2\text{CH}_3\text{COOH}$       | 3.2                      | -17.3                    | -8.8                     | -29.3                    |
| $\text{INT1} + \text{CH}_2\text{CH}_2 + \text{CH}_3\text{COOH}$                                                | 0.0                      | 0.0                      | 0.0                      | 0.0                      |
| $\text{INT2} + \text{CH}_2\text{CH}_2$                                                                         | -17.3                    | -6.6                     | -9.8                     | 1.3                      |
| $\text{TS1} + \text{CH}_2\text{CH}_2$                                                                          | 10.3                     | 22.1                     | 12.9                     | 24.2                     |
| $\text{INT3} + \text{CH}_2\text{CH}_2$                                                                         | 6.7                      | 19.2                     | 10.5                     | 21.2                     |
| $\text{TS2}$                                                                                                   | 25.0                     | 47.1                     | 32.8                     | 54.3                     |
| $\text{INT4} + \text{CH}_2\text{CH}_2\text{O}$                                                                 | -61.4                    | -51.3                    | -58.3                    | -47.4                    |
| $\text{INT5} + \text{CH}_2\text{CH}_2\text{O} + \text{CH}_3\text{COOH}$                                        | -46.8                    | -47.0                    | -50.0                    | -50.0                    |
| $\text{MnN}(\text{CN})_4^{2-} + \text{H}_2\text{O} + \text{CH}_2\text{CH}_2\text{O} + 2\text{CH}_3\text{COOH}$ | -44.6                    | -63.9                    | -58.6                    | -78.0                    |

**Table S2** Successive runs of catalytic epoxidation of 2-methyl-2-pentene by  $(\text{PPh}_4)_2[\text{Mn}(\text{N})(\text{CN})_4]/\text{H}_2\text{O}_2$  <sup>a</sup>

| No. of runs | accumulated epoxide yield (%) <sup>b</sup> |                                                  |
|-------------|--------------------------------------------|--------------------------------------------------|
|             | With $\text{CH}_3\text{CO}_2\text{H}$      | No $\text{CH}_3\text{CO}_2\text{H}$ <sup>c</sup> |
| 1           | 96                                         | 90                                               |
| 2           | 94                                         | 90                                               |
| 3           | 86                                         | 92                                               |
| 4           | 78                                         | 93                                               |
| 5           | 71                                         | 94                                               |
| 7           | -                                          | 95                                               |
| 10          | -                                          | 96                                               |
| 13          | -                                          | 96                                               |

<sup>a</sup> Reaction conditions for the 1<sup>st</sup> run:  $(\text{PPh}_4)_2[\text{Mn}(\text{N})(\text{CN})_4]$  (1 mol%),  $\text{CH}_3\text{CN}$  (1 mL),  $\text{CH}_3\text{CO}_2\text{H}$  (1 mmol), 2-methyl-2-pentene (1 mmol), argon atmosphere,  $T = 23$  °C, 30 min; reaction conditions for the other runs: 2-methyl-2-pentene (1 mmol),  $\text{CH}_3\text{CO}_2\text{H}$  (1 mmol) and  $\text{H}_2\text{O}_2$  in  $\text{H}_2\text{O}$  (1 mmol),  $T = 23$  °C, 30 min. <sup>b</sup> % yield based on the total amount of 2-methyl-2-pentene added. <sup>c</sup> No  $\text{CH}_3\text{CO}_2\text{H}$  was added in all runs.

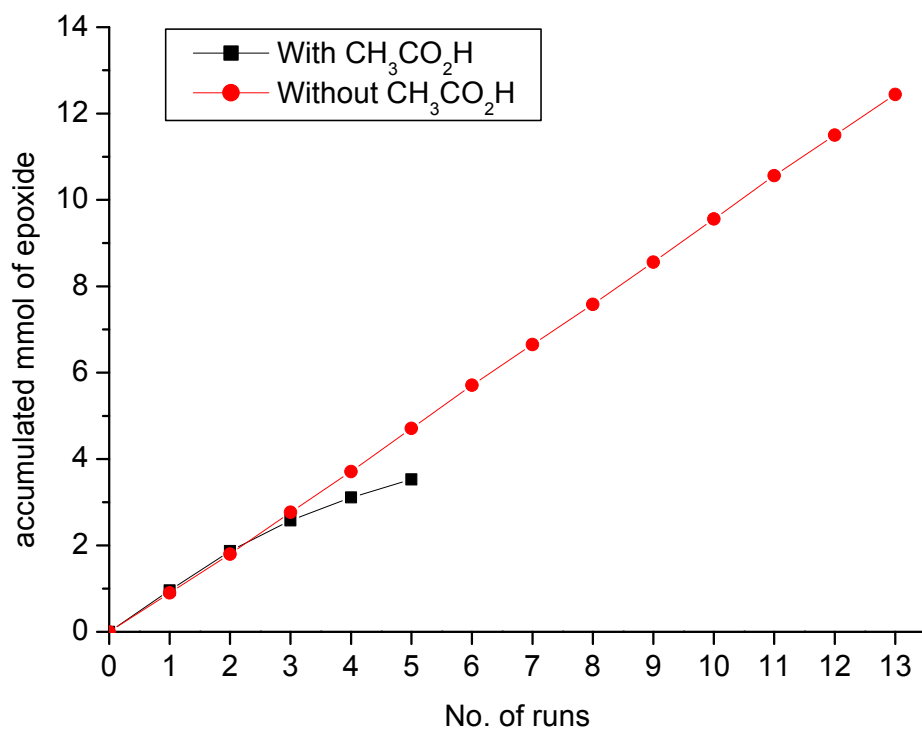

**Figure S1** Plot of accumulated mmol of epoxide vs. number of consecutive runs of epoxidation of 2-methyl-2-pentene by  $(\text{PPh}_4)_2[\text{Mn}(\text{N})(\text{CN})_4]/\text{H}_2\text{O}_2$

---

**Table S3** Effects of catalyst loadings on the catalytic epoxidation of 2-methyl-2-pentene by  $(\text{PPh}_4)_2[\text{Mn}(\text{N})(\text{CN})_4]/\text{H}_2\text{O}_2^a$

| Entry | catalyst loading (%) | $\text{H}_2\text{O}_2$ (equiv.) | Conv. (%) | Epoxide yield (%) <sup>b</sup> | Time   |
|-------|----------------------|---------------------------------|-----------|--------------------------------|--------|
| 1     | 1.0 <sup>c</sup>     | 1.05                            | 100       | 96                             | 5 min  |
| 2     | 0.1 <sup>d</sup>     | 1.05                            | 100       | 95                             | 15 min |
| 3     | 0.05 <sup>d</sup>    | 1.05                            | 94        | 90<br>(turnover 1800)          | 1.5 h  |
| 4     | 1.0                  | 1                               | 100       | 90                             | 10 min |
| 5     | 0.1                  | 1                               | 98        | 89                             | 6 h    |
| 6     | 0.05                 | 1                               | 91        | 88                             | 1 d    |

<sup>a</sup> Reaction conditions: 2-methyl-2-pentene (1 mmol),  $\text{CH}_3\text{CN}$  (1 mL), argon atmosphere,  $T = 23\text{ }^\circ\text{C}$ . <sup>b</sup> % yield based on the amount of substrate. <sup>c</sup> 0.1 mmol  $\text{CH}_3\text{CO}_2\text{H}$  was added. <sup>d</sup> 1 mmol  $\text{CH}_3\text{CO}_2\text{H}$  was added.

## References

1. J. Bendix, K. Meyer, T. Weyhermüller, E. Bill, N. Metzler-Nolte and K. Wieghardt, *Inorg. Chem.*, 1998, **37**, 1767.
2. *Purification and Laboratory Chemicals*, ed. D. D. Perrin and W. L. F. Armarego, Pergamon, New York, 3rd edn., 1988.
3. *Vogel's Textbook of Quantitative Chemical Analysis*, ed. G. H. Jeffrey, J. Bassett, J. Mendham and R. C. Denny, Longman, Essex, 5th edn., 1989.
4. T. G. Traylor and J. P. Ciccone, *J. Am. Chem. Soc.*, 1989, **111**, 8413.
5. I. W. C. E. Arends, K. U. Ingold and D. D. M. Wayner, *J. Am. Chem. Soc.*, 1995, **117**, 4710.
6. Beck, A. D., *J. Chem. Phys.* 1993, **98**, 5648.
7. (a) P. J. Hay and W. R. Wadt, *J. Chem. Phys.*, 1985, **82**, 270; (b) P. J. Hay and W. R. Wadt, *J. Chem. Phys.*, 1985, **82**, 284; (c) P. J. Hay and W. R. Wadt, *J. Chem. Phys.*, 1985, **82**, 299.
8. (a) S. Miertuš, E. Scrocco and J. Tomasi, *Chem. Phys.*, 1981, **55**, 117; (b) S. Miertuš and J. Tomasi, *Chem. Phys.*, 1982, **65**, 239.
9. *Gaussian 03, Revision D.01*, ed. M. J. Frisch, G. W. Trucks, H. B. Schlegel, G. E. Scuseria, M. A. Robb, J. R. Cheeseman, J. A. Montgomery, Jr., T. Vreven, K. N. Kudin, J. C. Burant, J. M. Millam, S. S. Iyengar, J. Tomasi, V. Barone, B. Mennucci, M. Cossi, G. Scalmani, N. Rega, G. A. Petersson, H. Nakatsuji, M. Hada, M. Ehara, K. Toyota, R. Fukuda, J. Hasegawa, M. Ishida, T. Nakajima, Y. Honda, O. Kitao, H. Nakai, M. Klene, X. Li, J. E. Knox, H. P. Hratchian, J. B. Cross, V. Bakken, C. Adamo, J. Jaramillo, R. Gomperts, R. E. Stratmann, O. Yazyev, A. J. Austin, R. Cammi, C. Pomelli, J. W. Ochterski, P. Y. Ayala, K. Morokuma, G. A. Voth, P. Salvador, J. J. Dannenberg, V. G. Zakrzewski, S.



Dapprich, A. D. Daniels, M. C. Strain, O. Farkas, D. K. Malick, A. D. Rabuck, K. Raghavachari, J. B. Foresman, J. V. Ortiz, Q. Cui, A. G. Baboul, S. Clifford, J. Cioslowski, B. B. Stefanov, G. Liu, A. Liashenko, P. Piskorz, I. Komaromi, R. L. Martin, D. J. Fox, T. Keith, M. A. Al-Laham, C. Y. Peng, A. Nanayakkara, M. Challacombe, P. M. W. Gill, B. Johnson, W. Chen, M. W. Wong, C. Gonzalez and J. A. Pople, Gaussian, Inc., Wallingford CT, 2004.
